# Supplementary material
Source: PubMed Central journal article supplement (PMC6690693)
Supplement: supp_RA119.009052_145092_1_supp_343476_psn84g.pdf [file supp_RA119.009052_145092_1_supp_343476_psn84g.pdf]

## **SUPPORTING INFORMATION**

### **The L-isoaspartate modification within protein fragments in the aging lens can promote protein aggregation**

**Rebecca A. Warmack<sup>a</sup>, Harrison Shawa<sup>a</sup>, Kate Liu<sup>a</sup>, Katia Lopez<sup>a</sup>, Joseph A. Loo<sup>a</sup>, Joseph Horwitz<sup>b</sup>, Steven G. Clarke<sup>a,\*</sup>**

#### **Materials included:**

Tables S1-S9

Figures S1-S2

| <u>Sequence</u>   | <u>Positions in Master Proteins</u> | <u>Theo. MH+</u><br><u>[Da]</u> | <u>Abundances</u><br><u>44 year old</u> | <u>Abundances</u><br><u>76 year old</u> | <u>Ion Score</u> |
|-------------------|-------------------------------------|---------------------------------|-----------------------------------------|-----------------------------------------|------------------|
| LFRTVLDSGISEVR    | P02489 [52-65]                      | 1591.88023                      | 2.2                                     | 197.8                                   | 70               |
| VLDSGISEVR        | P02489 [56-65]                      | 1074.57896                      | 12.9                                    | 187.1                                   | 65               |
| SADGMLTFCGPKIQ    | P02489 [134-147]                    | 1524.71851                      | 6                                       | 194                                     | 62               |
| RTVLDSGISEVR      | P02489 [54-65]                      | 1331.72775                      | 68.3                                    | 131.7                                   | 61               |
| SLFRTVLDSGISEVR   | P02489 [51-65]                      | 1678.91226                      |                                         | 200                                     | 61               |
| SADGMLTFCGPKI     | P02489 [134-146]                    | 1396.65993                      |                                         | 200                                     | 61               |
| SADGMLTFCGPKIQ    | P02489 [134-147]                    | 1540.71343                      | 21.3                                    | 178.7                                   | 61               |
| LDVKHFSPEDLTVK    | P02489 [75-88]                      | 1627.869                        | 0.8                                     | 199.2                                   | 58               |
| RTVLDSGISEVRSD    | P02489 [54-67]                      | 1533.78672                      | 191                                     | 9                                       | 57               |
| TVLDSGISEVRSD     | P02489 [55-67]                      | 1377.68561                      | 200                                     |                                         | 55               |
| VQDDFVEIH         | P02489 [89-97]                      | 1101.52111                      | 22.9                                    | 177.1                                   | 51               |
| LDVKHFSPEDLTVKVQD | P02489 [75-91]                      | 1970.02293                      | 1.6                                     | 198.4                                   | 51               |
| STISPYRQSLF       | P02489 [42-53]                      | 1461.73726                      | 0.9                                     | 199.1                                   | 49               |
| DDFVEIH           | P02489 [91-97]                      | 874.39412                       | 85.5                                    | 114.5                                   | 47               |
| KVQDDFVEIH        | P02489 [88-97]                      | 1229.61608                      | 183.7                                   | 16.3                                    | 45               |
| DVKHFSPEDLTVKVQD  | P02489 [76-91]                      | 1856.93887                      | 28.1                                    | 171.9                                   | 42               |
| VQDDFVEIHG        | P02489 [89-98]                      | 1158.54258                      |                                         | 200                                     | 42               |
| IFLDVK            | P02489 [73-78]                      | 734.4447                        | 181.3                                   | 18.7                                    | 37               |
| SCSLADGMLTFCGPKIQ | P02489 [130-147]                    | 1971.89728                      | 6.2                                     | 193.8                                   | 37               |
| VKVQDDFVEIH       | P02489 [87-97]                      | 1328.68449                      | 173.1                                   | 26.9                                    | 37               |
| RLFDQFFGE         | P02489 [21-29]                      | 1158.55783                      | 42.2                                    | 157.8                                   | 37               |
| TISPYRQSLF        | P02489 [43-53]                      | 1374.70523                      | 10.3                                    | 189.7                                   | 36               |
| RLFDQF            | P02489 [21-26]                      | 825.42536                       | 75.9                                    | 124.1                                   | 35               |
| LFRTVLDSGI        | P02489 [52-61]                      | 1120.63609                      |                                         | 200                                     | 34               |
| LDVKHFSPEDLTVKVQ  | P02489 [75-90]                      | 1854.99599                      | 0.6                                     | 199.4                                   | 34               |
| SADGMLTFCGPKIQT   | P02489 [134-148]                    | 1625.76619                      |                                         | 200                                     | 34               |
| LSSTISPYRQ        | P02489 [40-50]                      | 1314.66884                      | 200                                     |                                         | 34               |
| LFRTVLDSGISEVRSD  | P02489 [52-67]                      | 1793.9392                       | 24.8                                    | 175.2                                   | 33               |
| HFSPEDLTVKVQ      | P02489 [79-90]                      | 1399.72161                      |                                         | 200                                     | 33               |
| LFRTVLD           | P02489 [52-58]                      | 863.49853                       | 87.7                                    | 112.3                                   | 33               |
| SLFRTVLDSGIS      | P02489 [51-62]                      | 1294.70014                      | 51.8                                    | 148.2                                   | 33               |
| SSTISPYRQSLF      | P02489 [41-53]                      | 1548.76928                      | 10.8                                    | 189.2                                   | 32               |
| TVKVQDDFVEIH      | P02489 [86-97]                      | 1429.73217                      | 200                                     |                                         | 32               |
| DFVEIH            | P02489 [92-97]                      | 759.36718                       | 41.4                                    | 158.6                                   | 29               |
| LDVKHFSPEDLTVKV   | P02489 [75-89]                      | 1726.93741                      |                                         | 200                                     | 29               |
| LDVKHF            | P02489 [75-80]                      | 758.41955                       | 5.6                                     | 194.4                                   | 28               |
| RLFDQFF           | P02489 [21-27]                      | 972.49378                       | 80.7                                    | 119.3                                   | 27               |
| SLFRTVLDSGISEVRSD | P02489 [51-67]                      | 1880.97123                      | 27.9                                    | 172.1                                   | 26               |

**TABLE S1:**  $\alpha$ A crystallin peptides. Lens peptides were isolated from the gel filtration HMW fraction and identified as described in “Experimental Procedures.” All peptides with an ion score of 26 or higher are displayed with their corresponding theoretical mass and relative abundances in a 44-year-old and 76-year-old whole lens sample on a scale of 0-200.

| Sequence                 | Positions in Master Theo. MH+ Abundances |            |             |             |           |
|--------------------------|------------------------------------------|------------|-------------|-------------|-----------|
|                          | Proteins                                 | [Da]       | 44 year old | 76 year old | Ion Score |
| VLGDVIEVH                | P02511 [93-101]                          | 980.54112  | 57.2        | 142.8       | 73        |
| GEHLESDFPT               | P02511 [29-40]                           | 1357.66342 | 9.8         | 190.2       | 61        |
| RIPADVPLTIT              | P02511 [123-134]                         | 1310.73144 | 2.2         | 197.8       | 49        |
| RIPADVPLTITS             | P02511 [123-135]                         | 1397.76347 | 2.7         | 197.3       | 46        |
| GDVIEVH                  | P02511 [95-101]                          | 768.38864  |             | 200         | 43        |
| HFSPEELKVKVLGD           | P02511 [83-96]                           | 1597.85843 |             | 200         | 41        |
| EELKVKVL                 | P02511 [87-94]                           | 957.59791  | 8.9         | 191.1       | 39        |
| RAPSWFDGLSEMR            | P02511 [56-69]                           | 1652.78495 |             | 200         | 38        |
| VLGDVIEVHGK              | P02511 [93-103]                          | 1165.65755 |             | 200         | 37        |
| REEKPAVTAAPKK            | P02511 [163-175]                         | 1424.82199 |             | 200         | 37        |
| RIPADV                   | P02511 [123-129]                         | 785.41519  | 1.8         | 198.2       | 37        |
| HLLESDFPT                | P02511 [31-40]                           | 1171.59937 | 5.6         | 194.4       | 36        |
| RLFDQFFGE                | P02511 [22-30]                           | 1158.55783 | 42.2        | 157.8       | 36        |
| SSLSSDGVLTVNGPRKQ        | P02511 [135-151]                         | 1744.9188  | 69.4        | 130.6       | 34        |
| RLFDQF                   | P02511 [22-27]                           | 825.42536  | 75.9        | 124.1       | 34        |
| REEKPAVTAAPK             | P02511 [163-174]                         | 1296.72703 |             | 200         | 34        |
| YLRPPSFL                 | P02511 [48-55]                           | 992.55638  | 17.1        | 182.9       | 34        |
| HFSPEELKVKVL             | P02511 [83-94]                           | 1425.81003 | 0.6         | 199.4       | 33        |
| SSLSSDGVLTVNGPRKQ        | P02511 [136-151]                         | 1657.88677 | 73.3        | 126.7       | 33        |
| LSSDGVLTVNGPRK           | P02511 [137-150]                         | 1442.79617 |             | 200         | 31        |
| FHRKYRIPADVPLTIT         | P02511 [118-134]                         | 2042.11817 |             | 200         | 31        |
| HFSPEELKVK               | P02511 [83-92]                           | 1213.65755 |             | 200         | 31        |
| PEELKVKVL                | P02511 [86-94]                           | 1054.65067 | 6.2         | 193.8       | 30        |
| RIPADVPLTITSS            | P02511 [123-136]                         | 1484.7955  |             | 200         | 30        |
| SPEELKVKVL               | P02511 [85-94]                           | 1141.6827  | 9.8         | 190.2       | 30        |
| VSGPERTIPITREEKPAVTAAPKK | P02511 [152-175]                         | 2575.45661 | 74.6        | 125.4       | 29        |
| RFSVNLDVKHF              | P02511 [74-84]                           | 1361.73245 | 21.8        | 178.2       | 28        |
| LDVKHFSPEELKVK           | P02511 [79-92]                           | 1668.93193 |             | 200         | 28        |
| RIPADVPL                 | P02511 [123-131]                         | 995.55202  | 20.2        | 179.8       | 27        |
| SSLSSDGVLTVNGPRKQV       | P02511 [135-152]                         | 1843.98722 |             | 200         | 27        |
| LDVKHF                   | P02511 [79-84]                           | 758.41955  | 5.6         | 194.4       | 27        |
| KYRIPADVPLTIT            | P02511 [121-134]                         | 1601.88973 |             | 200         | 26        |
| RIPADVPLTITSSLS          | P02511 [123-138]                         | 1684.91159 |             | 200         | 26        |
| RLFDQFF                  | P02511 [22-28]                           | 972.49378  | 80.7        | 119.3       | 26        |
| VKHFSPEELKVKVL           | P02511 [81-94]                           | 1652.9734  |             | 200         | 26        |

**TABLE S2:**  $\alpha$ B crystallin peptides. Lens peptides were isolated from the gel filtration HMW fraction and identified as described in “Experimental Procedures.” All peptides with an ion score of 26 or higher are displayed with their corresponding theoretical mass and relative abundances in a 44-year-old and 76-year-old whole lens sample on a scale of 0-200.

| <u>Sequence</u> | <u>Positions in Master Proteins</u> | <u>Theo. MH+ [Da]</u> | <u>Abundances 44 year old</u> | <u>Abundances 76 year old</u> | <u>Ion Score</u> |
|-----------------|-------------------------------------|-----------------------|-------------------------------|-------------------------------|------------------|
| GPWKITIYD       | P05813 [29-37]                      | 1092.57242            | 200                           |                               | 47               |
| GWFNNEVGSMKIQ   | P05813 [152-164]                    | 1509.71547            |                               | 200                           | 28               |
| TIFEKENFIGRQ    | P05813 [127-138]                    | 1481.7747             | 16                            | 184                           | 27               |
| SKMTIF          | P05813 [124-129]                    | 726.38547             | 1.4                           | 198.6                         | 27               |
| WEISDDYPSLQAM   | P05813 [139-151]                    | 1554.67809            | 0.4                           | 199.6                         | 26               |

**TABLE S3:**  $\beta$ A3 crystallin peptides. Lens peptides were isolated from the gel filtration HMW fraction and identified as described in “Experimental Procedures.” All peptides with an ion score of 26 or higher are displayed with their corresponding theoretical mass and relative abundances in a 44-year-old and 76-year-old whole lens sample on a scale of 0-200.

| <u>Sequence</u>    | <u>Proteins</u>  | <u>Theo. MH+</u><br><u>[Da]</u> | <u>Abundances</u>  |                    | <u>Ion Score</u> |
|--------------------|------------------|---------------------------------|--------------------|--------------------|------------------|
|                    |                  |                                 | <u>44 year old</u> | <u>76 year old</u> |                  |
| TIFEQENFLGKK       | P53673 [108-119] | 1453.76856                      |                    | 200                | 55               |
| IFEQENFLGKK        | P53673 [109-119] | 1352.72088                      | 1.4                | 198.6              | 45               |
| GELSDDYPSLQAM      | P53673 [120-132] | 1425.62024                      | 1.8                | 198.2              | 45               |
| SRLTIFEQENFLGKK    | P53673 [105-119] | 1809.98576                      |                    | 200                | 42               |
| DSRLTIFEQENFLGKK   | P53673 [104-119] | 1925.0127                       |                    | 200                | 42               |
| SGAWVCSQFPGYRGF    | P53673 [146-160] | 1718.77439                      | 30.8               | 169.2              | 36               |
| ERLTSFRPA          | P53673 [89-97]   | 1076.58472                      |                    | 200                | 32               |
| FQVQSIR            | P53673 [186-192] | 877.48903                       | 24.1               | 175.9              | 32               |
| GELSDDYPSLQ        | P53673 [120-130] | 1223.54264                      | 6.3                | 193.7              | 31               |
| SRLTIF             | P53673 [105-110] | 736.4352                        | 8.8                | 191.2              | 30               |
| SGAWVCSQFPGYRG     | P53673 [146-159] | 1571.70597                      | 115.8              | 84.2               | 29               |
| GWEGNEVGSFHVH      | P53673 [133-145] | 1454.64475                      | 200                |                    | 29               |
| FLGKKGELSDDYPSLQAM | P53673 [115-132] | 1998.9841                       |                    | 200                | 27               |
| KGELSDDYPSLQAM     | P53673 [119-132] | 1553.7152                       |                    | 200                | 27               |

**TABLE S4:**  $\beta$ A4 crystallin peptides. Lens peptides were isolated from the gel filtration HMW fraction and identified as described in “Experimental Procedures.” All peptides with an ion score of 26 or higher are displayed with their corresponding theoretical mass and relative abundances in a 44-year-old and 76-year-old whole lens sample on a scale of 0-200.

| Sequence               | Positions in Master Proteins | Theo. MH+ [Da] | Abundances 44 year old | Abundances 76 year old | Ion Score |
|------------------------|------------------------------|----------------|------------------------|------------------------|-----------|
| HLEGSFPVLA             | P53674 [238-247]             | 1069.56767     |                        | 200                    | 62        |
| HLEGSFPVLATEPPK        | P53674 [238-252]             | 1621.85843     | 21                     | 179                    | 59        |
| EGSFPVLATEPPK          | P53674 [240-252]             | 1371.71546     | 2.3                    | 197.7                  | 55        |
| SFPVLATEPPK            | P53674 [242-252]             | 1185.6514      | 54.3                   | 145.7                  | 54        |
| TLAPTTVPITSAK          | P53674 [38-50]               | 1299.75184     | 22.2                   | 177.8                  | 50        |
| RDKQWHLEGSFPVLATEPPK   | P53674 [233-252]             | 2335.21934     |                        | 200                    | 48        |
| RLRDKQWHLEGSFPVLATEPPK | P53674 [231-252]             | 2604.40452     |                        | 200                    | 45        |
| VVFELENFQGR            | P53674 [62-72]               | 1337.68483     |                        | 200                    | 44        |
| GSFPVLATEPPK           | P53674 [241-252]             | 1242.67286     | 39.7                   | 160.3                  | 39        |
| WHLEGSFPVLATEPPK       | P53674 [237-252]             | 1807.93775     |                        | 200                    | 39        |
| MFILEKG                | P53674 [113-119]             | 837.45389      | 18.7                   | 181.3                  | 38        |
| NFRGEMFILEKG           | P53674 [108-119]             | 1440.7304      |                        | 200                    | 30        |
| TTLAPTTVPITSA          | P53674 [37-49]               | 1272.70456     | 12.7                   | 187.3                  | 28        |
| LEGSFPVLATEPPK         | P53674 [239-252]             | 1484.79952     | 38.9                   | 161.1                  | 28        |
| WHLEGSFPVLA            | P53674 [237-247]             | 1255.64698     |                        | 200                    | 27        |
| RLMSFRPIKM             | P53674 [135-144]             | 1278.71733     |                        | 200                    | 26        |

**TABLE S5:**  $\beta$ B1 crystallin peptides. Lens peptides were isolated from the gel filtration HMW fraction and identified as described in “Experimental Procedures.” All peptides with an ion score of 26 or higher are displayed with their corresponding theoretical mass and relative abundances in a 44-year-old and 76-year-old whole lens sample on a scale of 0-200.

| <u>Sequence</u>           | <u>Positions in Master Proteins</u> | <u>Theo. MH+ [Da]</u> | <u>Abundances</u>  |                    | <u>Ion Score</u> |
|---------------------------|-------------------------------------|-----------------------|--------------------|--------------------|------------------|
|                           |                                     |                       | <u>44 year old</u> | <u>76 year old</u> |                  |
| KMEIIDDVPSFHAH            | P43320 [121-135]                    | 1753.8214             |                    | 200                | 51               |
| KMEIIDDVPSFHA             | P43320 [121-134]                    | 1616.76248            |                    | 200                | 48               |
| KMEIIDDVPSFHAHG           | P43320 [121-136]                    | 1810.84286            |                    | 200                | 41               |
| MEIIDDVPSFHAH             | P43320 [122-135]                    | 1625.72643            |                    | 200                | 35               |
| SVRVQSGTWVGYQYPGYRGL      | P43320 [143-162]                    | 2273.14618            |                    | 200                | 34               |
| KMEIIDDVPSFH              | P43320 [121-133]                    | 1545.72537            |                    | 200                | 33               |
| SGTWVGYQYPGYRGL           | P43320 [148-162]                    | 1703.81763            |                    | 200                | 33               |
| KMEIIDDVPSFHAHGYQEKVSSRVQ | P43320 [121-147]                    | 3114.53131            | 3.1                | 196.9              | 31               |
| PKIIF                     | P43320 [17-22]                      | 730.48617             | 8.3                | 191.7              | 29               |
| SHELNGPCPNLKETGVEKAGSVLVQ | P43320 [31-55]                      | 2663.34574            |                    | 200                | 26               |
| EIIDDVPSFHAH              | P43320 [123-135]                    | 1494.68595            | 5.4                | 194.6              | 26               |

**TABLE S6:**  $\beta$ B2 crystallin peptides. Lens peptides were isolated from the gel filtration HMW fraction and identified as described in “Experimental Procedures.” All peptides with an ion score of 26 or higher are displayed with their corresponding theoretical mass and relative abundances in a 44-year-old and 76-year-old whole lens sample on a scale of 0-200.

| <u>Sequence</u>    | <u>Positions in Master Proteins</u> | <u>Theo. MH+ [Da]</u> | <u>Abundances</u>  |                    | <u>Ion Score</u> |
|--------------------|-------------------------------------|-----------------------|--------------------|--------------------|------------------|
|                    |                                     |                       | <u>44 year old</u> | <u>76 year old</u> |                  |
| GELAGPEDALARQVE    | Q12934 [79-93]                      | 1554.77583            | 66.3               | 133.7              | 77               |
| FIETPIPLFTQSH      | Q12934 [324-336]                    | 1529.79986            |                    | 200                | 66               |
| RVELQAQTTTLEQAIK   | Q12934 [239-254]                    | 1829.0127             | 5.8                | 194.2              | 61               |
| FIETPIPLFTQ        | Q12934 [324-334]                    | 1305.70892            | 1.1                | 198.9              | 53               |
| AQRVELQAQTTTLEQAIK | Q12934 [237-254]                    | 2028.10839            |                    |                    | 51               |
| QQIIHTTTPPASIVTS   | Q12934 [191-205]                    | 1592.86425            | 2.6                | 197.4              | 50               |
| SLAALQGLGERVA      | Q12934 [40-52]                      | 1284.72703            | 12.3               | 187.7              | 48               |
| GELAGPEDALARQV     | Q12934 [79-92]                      | 1425.73323            |                    | 200                | 48               |
| QQIIHTTTPPASIVT    | Q12934 [191-204]                    | 1505.83222            | 6.1                | 193.9              | 47               |
| TTTLEQAIKSA        | Q12934 [246-256]                    | 1162.63139            | 6.5                | 193.5              | 45               |
| LDAFQRLGEL         | Q12934 [72-81]                      | 1161.62625            |                    | 200                | 45               |
| GELAGPEDALAR       | Q12934 [79-90]                      | 1198.60624            |                    | 200                | 42               |
| ISILQQIIH          | Q12934 [187-195]                    | 1064.64626            | 12                 | 188                | 42               |
| FIETPIPLFT         | Q12934 [324-333]                    | 1177.65034            | 4.5                | 195.5              | 42               |
| SLAALQGLGERVAAH    | Q12934 [40-54]                      | 1492.82305            |                    | 200                | 40               |
| KTVEVESIEKIS       | Q12934 [620-632]                    | 1460.82065            | 2.4                | 197.6              | 39               |
| QQIIHTTTPPASIVTSGM | Q12934 [191-207]                    | 1780.9262             |                    | 200                | 38               |
| IETPIPLFTQ         | Q12934 [325-334]                    | 1158.6405             | 0.4                | 199.6              | 37               |
| RLQLEAQ            | Q12934 [157-163]                    | 857.48394             | 2.2                | 197.8              | 36               |
| FIETPIPLFTQSHG     | Q12934 [324-337]                    | 1586.82132            |                    | 200                | 35               |
| NKEADEALLHNL       | Q12934 [145-156]                    | 1366.69612            | 6.4                | 193.6              | 34               |
| LTEREVAAL          | Q12934 [213-221]                    | 1001.56259            |                    | 200                | 34               |
| RQLDAFQRL          | Q12934 [70-78]                      | 1146.63782            | 12.8               | 187.2              | 33               |
| GMREEKLLTEREVAAL   | Q12934 [206-221]                    | 1844.98986            |                    | 200                | 33               |
| IETPIPLFTQSH       | Q12934 [325-336]                    | 1382.73144            |                    | 200                | 33               |
| LDAFQRL            | Q12934 [72-78]                      | 862.47813             | 13.3               | 186.7              | 33               |
| AFQRLGELAGPE       | Q12934 [74-85]                      | 1287.66918            | 177.5              | 22.5               | 32               |
| IETPIPLF           | Q12934 [325-332]                    | 929.53425             |                    | 200                | 32               |
| MREEKLLTEREVAAL    | Q12934 [207-221]                    | 1787.96839            |                    | 200                | 31               |
| VIVETMIGKTK        | Q12934 [644-654]                    | 1218.71262            | 200                |                    | 31               |
| FIETPIPL           | Q12934 [324-331]                    | 929.53425             |                    | 200                | 31               |
| FIETPIPLF          | Q12934 [324-332]                    | 1076.60266            |                    | 200                | 30               |
| QLDAFQRL           | Q12934 [71-78]                      | 990.53671             |                    | 200                | 30               |
| RIIEIEGNRLT        | Q12934 [311-321]                    | 1313.75357            | 9.2                | 190.8              | 28               |
| AALQGLGERVAAHVQ    | Q12934 [42-56]                      | 1519.83395            | 39.6               | 160.4              | 27               |
| REEKLLTEREVAAL     | Q12934 [208-221]                    | 1656.92791            | 6.1                | 193.9              | 27               |
| LEEGREVLSHL        | Q12934 [225-235]                    | 1281.67974            |                    | 200                | 27               |
| RVELQAQTTTLEQAIS   | Q12934 [239-255]                    | 1916.04473            |                    | 200                | 27               |
| SLAALQGLGERVAAHVQ  | Q12934 [40-56]                      | 1719.95004            |                    | 200                | 26               |

**TABLE S7:** Filensin peptides. Lens peptides were isolated from the gel filtration HMW fraction and identified as described in “Experimental Procedures.” All peptides with an ion score of 26 or higher are displayed with their corresponding theoretical mass and relative abundances in a 44-year-old and 76-year-old whole lens sample on a scale of 0-200.



| <u>Sequence</u> | <u>Positions in Master Proteins</u> | <u>Theo. MH+ [Da]</u> | <u>Abundances</u>  |                    | <u>Ion Score</u> |
|-----------------|-------------------------------------|-----------------------|--------------------|--------------------|------------------|
|                 |                                     |                       | <u>44 year old</u> | <u>76 year old</u> |                  |
| YILPQGEYPEYQRWM | P22914 [60-74]                      | 1972.9262             |                    | 200                | 45               |
| IFEKGDMSGQ      | P22914 [98-107]                     | 1127.53677            |                    | 200                | 43               |
| GEYPEYQRWM      | P22914 [65-74]                      | 1358.5834             | 13.2               | 186.8              | 41               |

**TABLE S8:**  $\gamma$ S crystallin peptides. Lens peptides were isolated from the gel filtration HMW fraction and identified as described in “Experimental Procedures.” All peptides with an ion score of 26 or higher are displayed with their corresponding theoretical mass and relative abundances in a 44-year-old and 76-year-old whole lens sample on a scale of 0-200.

| Sequence                | Positions in Master Proteins | Theo. MH+ [Da] | Abundances  |             | Ion Score |
|-------------------------|------------------------------|----------------|-------------|-------------|-----------|
|                         |                              |                | 44 year old | 76 year old |           |
| QQVGEAVLENARL           | Q13515 [162-174]             | 1426.76487     |             | 200         | 60        |
| WASSCQQVGEAVLENARL      | Q13515 [157-174]             | 2017.976       |             | 200         | 57        |
| KVIDEANLTKM             | Q13515 [211-221]             | 1261.68205     | 6.3         | 193.7       | 56        |
| TGLDDILETIRIQ           | Q13515 [266-278]             | 1486.81115     |             | 200         | 56        |
| QQVGEAVLENARLM          | Q13515 [162-175]             | 1557.80535     | 4           | 196         | 55        |
| RASWASSCQQVGEAVLENARL   | Q13515 [154-174]             | 2332.14625     |             | 200         | 53        |
| SSCQQVGEAVLENARLM       | Q13515 [159-175]             | 1891.90006     | 2.1         | 197.9       | 51        |
| RASWASSCQQVGEAVLENARLM  | Q13515 [154-175]             | 2463.18674     |             | 200         | 50        |
| KVIDEANLTKMDLESQIE      | Q13515 [211-228]             | 2076.05291     |             | 200         | 48        |
| SWASSCQQVGEAVLENARL     | Q13515 [156-174]             | 2105.00803     |             | 200         | 47        |
| WASSCQQVGEAVLENARLM     | Q13515 [157-175]             | 2149.01648     | 0.2         | 199.8       | 45        |
| QVGEAVLENARLM           | Q13515 [163-175]             | 1429.74677     |             | 200         | 44        |
| SCQQVGEAVLENARLM        | Q13515 [160-175]             | 1804.86803     | 1.2         | 198.8       | 44        |
| QVGEAVLENARL            | Q13515 [163-174]             | 1298.70629     | 23.7        | 176.3       | 41        |
| SVFLQGLRSSGL            | Q13515 [82-93]               | 1263.70556     | 7           | 193         | 40        |
| SLYKVIDEANLTKM          | Q13515 [208-221]             | 1624.86147     | 12.4        | 187.6       | 39        |
| YHALLD                  | Q13515 [405-410]             | 731.37227      |             | 200         | 30        |
| GLRSSGLATVPAPGLER       | Q13515 [87-103]              | 1680.93914     | 20.9        | 179.1       | 30        |
| SWASSCQQVGEAVLENARLM    | Q13515 [156-175]             | 2236.04851     |             | 200         | 30        |
| HALLDREE                | Q13515 [406-413]             | 982.49523      | 2.9         | 197.1       | 29        |
| SCQQVGEAVLENARL         | Q13515 [160-174]             | 1673.82754     |             | 200         | 29        |
| YHALLDREE               | Q13515 [405-413]             | 1145.55856     | 4.4         | 195.6       | 29        |
| SVFLQGLRSSGLATVPAPGLERD | Q13515 [82-104]              | 2370.27758     |             | 200         | 29        |
| HMSQTQEEKLAAAL          | Q13515 [304-317]             | 1556.77372     |             | 200         | 28        |
| SVFLQGLR                | Q13515 [82-89]               | 919.53598      | 9           | 191         | 28        |
| AAAAEINSLY              | Q13515 [202-210]             | 1067.48915     |             | 200         | 28        |
| ALLDREESG               | Q13515 [407-415]             | 989.48981      |             | 200         | 27        |
| DILETIRIQ               | Q13515 [270-278]             | 1100.631       | 15.2        | 184.8       | 27        |
| GAVVGRL                 | Q13515 [364-370]             | 671.41989      |             | 200         | 26        |
| SVFLQGLRSSGLA           | Q13515 [82-94]               | 1334.74268     | 2.4         | 197.6       | 26        |
| AVLENARLM               | Q13515 [167-175]             | 1016.55573     | 11          | 189         | 26        |
| SVFLQGLRSS              | Q13515 [82-91]               | 1093.60003     | 31.3        | 168.7       | 26        |
| SVFLQGLRSSGLATVPAPGLER  | Q13515 [82-103]              | 2255.25064     |             | 200         | 26        |

**TABLE S9:** Phakinin peptides. Lens peptides were isolated from the gel filtration HMW fraction and identified as described in “Experimental Procedures.” All peptides with an ion score of 26 or higher are displayed with their corresponding theoretical mass and relative abundances in a 44-year-old and 76-year-old whole lens sample on a scale of 0-200.

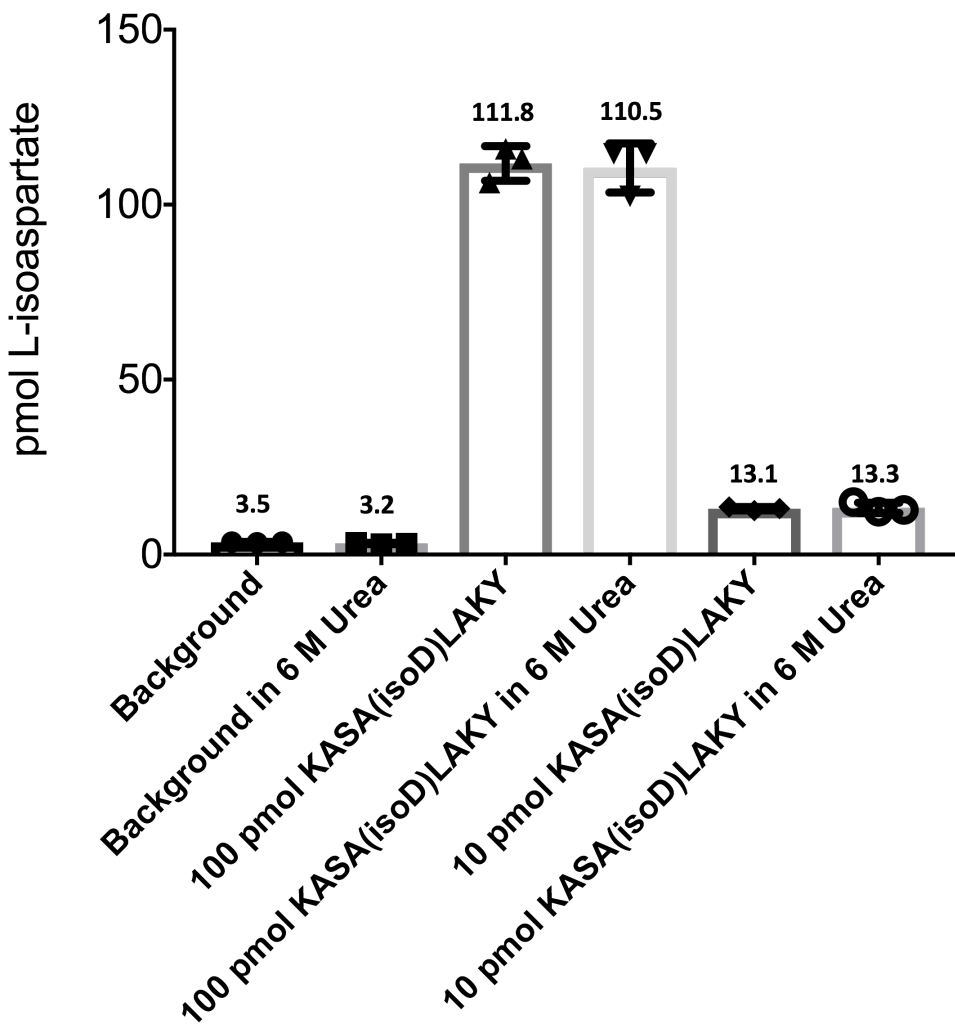

**Fig. S1: Exogenous PCMT1 labeling of L-isoAsp is not affected by urea.** KASA(isoD)LAKY peptide was resuspended in 50 mM Tris-HCl, pH 7.9, 150 mM NaCl, and 6 M urea to match buffer conditions of re-solubilized water-insoluble lens extracts (“in 6 M urea” indicated on the x-axis), or in 50 mM Tris-HCl, pH 7.9, 150 mM NaCl buffer lacking urea to match buffer conditions of water-soluble lens extracts. These buffers alone were used in the “Background” reactions. Buffer alone, 100 pmol of KASA(isoD)LAKY, and 10 pmol of KASA(isoD)LAKY were analyzed for L-isoAsp content by PCMT1 methylation as described in the Experimental Procedures section. Reactions were performed in triplicate, and the average value is displayed above each column. Error bars represent the standard deviation.

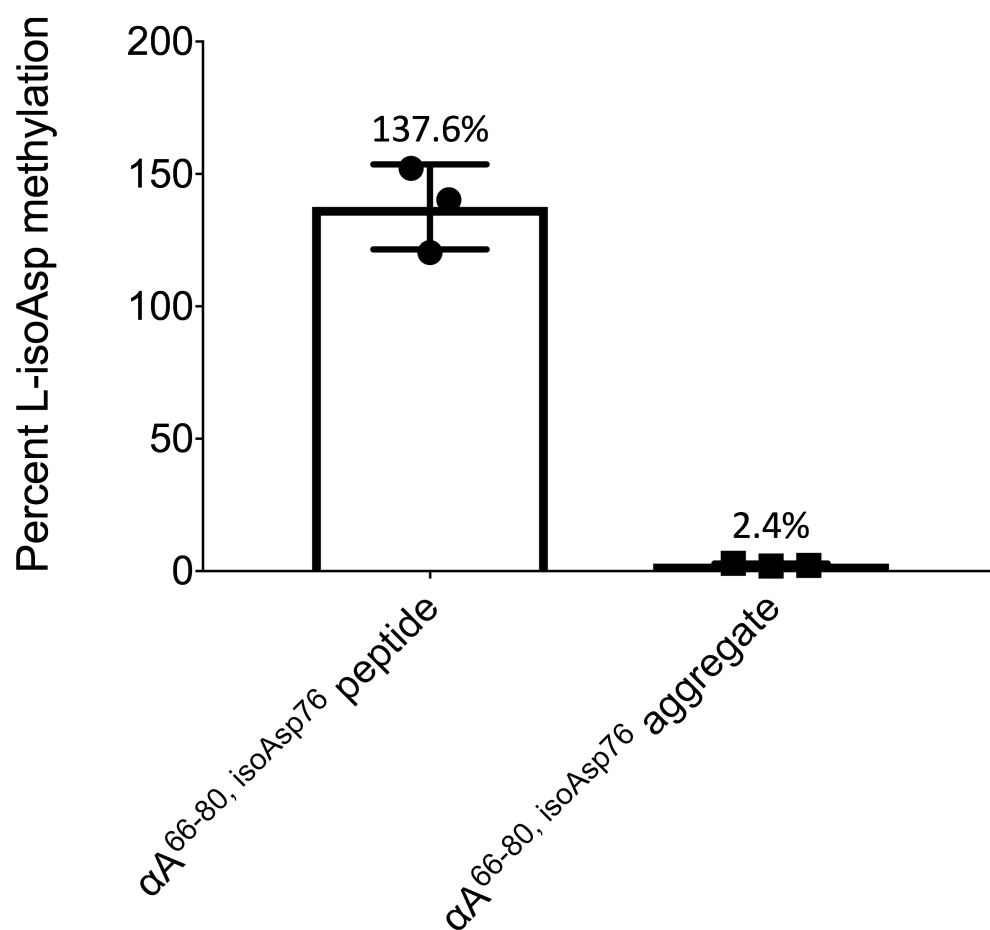

**Fig. S2: Exogenous PCMT1 cannot methylate aggregated  $\alpha A^{66-80, isoAsp76}$  peptide.** Aggregates of  $\alpha A^{66-80, isoAsp76}$  were formed at 1 mg/mL in 50 mM Tris-HCl, pH 7.6, 150 mM NaCl (TBS). Soluble peptide solutions of  $\alpha A^{66-80, isoAsp76}$  were prepared by dissolving  $\alpha A^{66-80, isoAsp76}$  in TBS with 10% DMSO and filtering immediately prior to PCMT1 methylation assays, carried out as described in the Experimental Procedures section. Values of “Percent L-isoAsp methylation” were calculated by dividing the pmol of L-isoAsp methylated by the pmol of L-isoAsp present in the reaction (70 pmol soluble peptide analyzed, 1000 pmol aggregate analyzed). Error bars represent the standard deviation.

Size exclusion chromatography-separated lens nuclear extracts

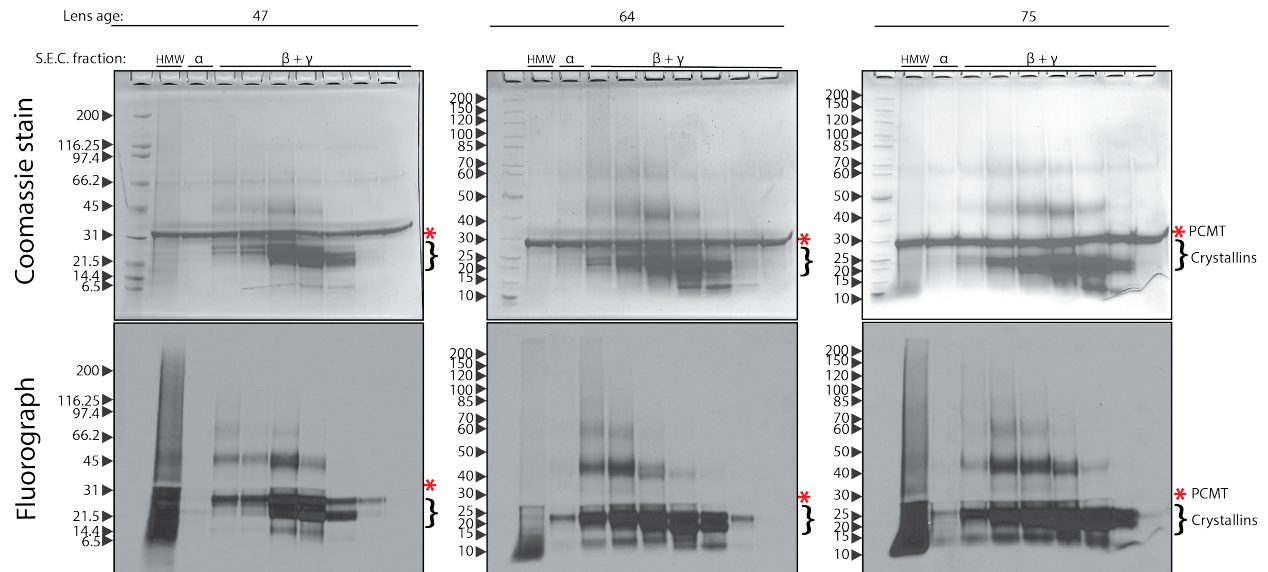

**Fig. S3: Analysis of L-isoAsp damage in the native size-exclusion fractions of human nuclear lens extracts by SDS-PAGE reveals the HMW gel filtration fraction contains significant amounts of LMW L-isoaspartyl-containing species.** Fractions from size exclusion chromatography as in Fig. 4 were trichloroacetic acid-precipitated, resuspended in 100 mM Tris-HCl, pH 7.9, 150 mM NaCl, 0.1% SDS, 6 M Urea and L-isoAsp sites within the fractions were radiolabeled by PCMT1 and [<sup>3</sup>H] AdoMet as described in the Fig. 3 legend. Labeled fractions were then separated by SDS-PAGE on a 4-12% gradient gel. The Coomassie-stained gel is shown in the upper panels; the fluorograph (one week exposure) is shown in the lower panels. In the experiment with the 47-year-old extract, molecular weight markers shown in Fig. 3 were used; in the 64- and 75-year-old-samples the molecular weight standards include synthetic polypeptides of the designated molecular weights (Thermo-Scientific, PageRuler Unstained Protein Ladder, catalog # 26614). The bands corresponding to PCMT1 in the Coomassie-stained gel are indicated by asterisks. The migration positions of intact crystallins are indicated by brackets on the right hand side of the gels. Labels above lanes represent the corresponding peaks from the size exclusion run (see Fig. 4). The age of lens sample in years is designated above the corresponding gel.

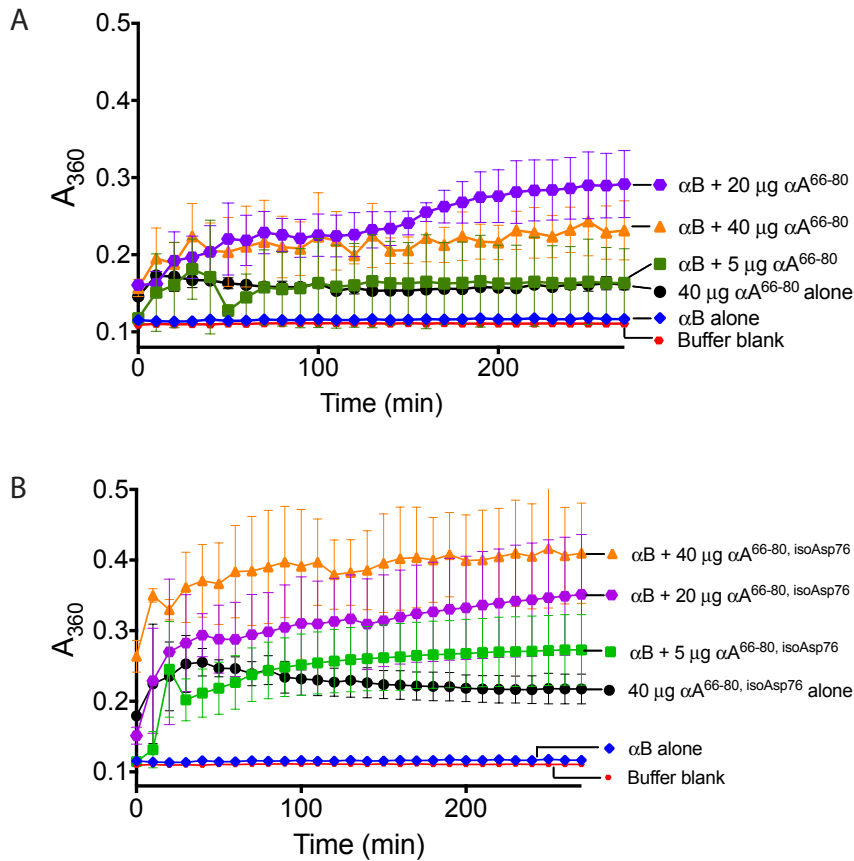

**Fig. S4: The  $\alpha\text{A}^{66-80, \text{isoAsp76}}$  peptide aggregates purified  $\alpha\text{B}$  crystallin more than the native  $\alpha\text{A}^{66-80}$  peptide.**  $\alpha\text{B}$  crystallin ( $40\ \mu\text{g}$ ) was incubated with designated amounts of the  $\alpha\text{A}^{66-80}$  (top panel) or  $\alpha\text{A}^{66-80, \text{isoAsp76}}$  (bottom panel) peptide in  $50\ \text{mM}$  sodium phosphate,  $\text{pH}\ 7.0$ ,  $100\ \text{mM}$   $\text{NaCl}$ , and  $10\ \text{mM}$  phenanthroline as described in the “Experimental Procedures” section. Aggregation was monitored by light scattering at  $A_{360}$ . Symbols represent the mean and error bars represent the standard deviation of three technical replicates.
